# Supplementary material for: Preparation of nano-MFI zeolites doped with Al/Ti and their performance in VOC sorption
Source: Royal Society of Chemistry journal article supplement (doi:10.1039/d3dt04314b), 2024-01-01
Supplement: d3dt04314b1.pdf [file d3dt04314b1.pdf]

## Electronic Supplementary Information

### Preparation of nano-MFI zeolites doped with Al/Ti and their performance for VOCs sorption

Xiaolong Wang<sup>a, b</sup>, Donghang Chen<sup>a, b</sup>, Yongsheng Jia<sup>c</sup>, Zhongyu Jiang<sup>a, b</sup>, Kongzhai Li<sup>d</sup>,  
Soamwadee Chaianansutcharit<sup>e</sup>, Prasert Reubroycharoen<sup>f</sup> and Limin Guo<sup>a, b, \*</sup>

<sup>a</sup>School of Environmental Science and Engineering, Huazhong University of Science and  
Technology, Wuhan 430074, China

<sup>b</sup>Hubei Key Laboratory of Multi-media Pollution Cooperative Control in Yangtze Basin,  
School of Environmental Science & Engineering, Huazhong University of Science and  
Technology, Wuhan, 430074, China

<sup>c</sup>State Key Laboratory of Advanced Electromagnetic Engineering and Technology, School of  
Electrical and Electronic Engineering, Huazhong University of Science and Technology, Wuhan  
430074, China

<sup>d</sup>Faculty of Metallurgical and Energy Engineering, Kunming University of Science and  
Technology, Kunming 650093, China

<sup>e</sup>Department of Chemistry, Faculty of Science, Chulalongkorn University, Bangkok 10330,  
Thailand

<sup>f</sup>Department of Chemical Technology, Faculty of Science, Chulalongkorn University,  
Bangkok 10330, Thailand

\*Corresponding author.

*E-mail:* limguo@hust.edu.cn (Limin Guo).

## Characterization

The powder X-ray diffraction (XRD) patterns were obtained on a Shimadzu XRD-7000 diffractometer. Fourier transform infrared spectroscopy (FTIR) was conducted on a Bruker Tensor II spectrometer. The N<sub>2</sub> sorption measurements of the samples were carried out by a Micromeritics Tristar II 3020 at 77 K. Field emission scanning electron microscopic (FE-SEM) observation was performed on a Nova Nano SEM 450 field emission scanning electron microscopy. Transmission Electron Microscopy (TEM) images were collected using a Talos F200X TEM. The ammonia temperature-programmed desorption (NH<sub>3</sub>-TPD) was carried out by an autocatalytic adsorption system (VDSorb-91i, Vodo). The actual Si/M (M = Al or Ti) ratios were tested by X-ray Fluorescence (XRF, AXIOSmAX) analysis.

## Dynamic adsorption testing

Dynamic adsorption measurements were carried out using a fixed-bed reactor equipped with a gas chromatography (GC) apparatus with the hydrogen flame ion detector (FID). 0.1 g of 40-60 mesh sample particles were packed into a quartz tube with an internal diameter of 4 mm. 400 ppm toluene or 558 ppm acetone balanced by N<sub>2</sub> (80%) and O<sub>2</sub> (20%) at a mass flow rate of 100 mL min<sup>-1</sup> was fed into a fixed-bed quartz tube reactor at 303 K. The tested samples were treated under N<sub>2</sub> flow at 573 K for 1 hour before measurement. The sampling interval was 2 minutes. When testing the adsorption properties of samples in the presence of water, the water vapor bubble bottle was used, and the relative humidity was controlled to be 50% by bubbling N<sub>2</sub> at a flow rate of 50 mL min<sup>-1</sup> into the water. The dynamic adsorption capacity (q) of the sample is calculated according to equation (1).

$$q = \frac{F * C_0 * 10^{-6}}{W} \left[ t_s - \int_0^{t_s} \frac{C_t}{C_0} dt \right] \quad (1)$$

where q (mg/g) is the dynamic adsorption capacity of the sample, F (mL/min) is the gas flow rate, C<sub>0</sub> (mg/L) is the initial concentration of VOCs, C<sub>t</sub> (mg/L) is the concentration of VOCs monitored by GC at time t, W (g) is the adsorbent mass, t (min)

is the adsorption time, and  $t_s$  (min) is the time to reach adsorption equilibrium.

### Adsorption-desorption cycle test

Utilizing an adsorption-desorption cycle test, the cyclic regeneration effectiveness of the samples was determined. Gas chromatography with FID was used to monitor the variations in VOCs content during adsorption and desorption during the sample adsorption-desorption cycling test. For each experiment, 0.1 g of 40-60 mesh adsorbent was inserted into a quartz tube and pretreated for one hour at 573 K. After the temperature was lowered to 303 K, 400 ppm of VOCs gas was added. As soon as the sample attained adsorption equilibrium, the VOCs were separated from the adsorbed gas, and the adsorbent fixed bed was heated to 573 K at a rate of  $10 \text{ K} \cdot \text{min}^{-1}$  for one hour. After desorption was complete, the adsorbent was carried out adsorption and desorption process five times without replacement under the same conditions of saturation and desorption.

### Temperature-programmed desorption measurements

Temperature-programmed desorption of toluene (Toluene-TPD) and acetone (Acetone-TPD) measurements were carried out at different heating rates from 4 K/min to 10 K/min. The signal of toluene was detected by online mass spectrometry (MS, Hiden HPR 20). For each test, 0.1 g of 40-60 mesh adsorbent was weighed and put into a quartz tube. It was heated at 573 K for an hour to remove moisture and impurities while being purged with a 100 mL/min stream of high-purity argon gas. The sample was then cooled to room temperature. After the samples were adsorbed with 1000 ppm VOCs to saturation at room temperature, it was cleaned for one hour with argon gas to get rid of the VOCs that had stuck to its surface. The ramp-up program was then set, and the change in VOCs during desorption was measured.

Based on the desorption peak temperatures of TPD curves at different heating rates, the active energy between toluene and samples was calculated by the following equation.

$$\ln \left( \frac{RT_p^2}{\beta_H} \right) = \frac{E}{R} \cdot \frac{1}{T_p} + \ln \left( \frac{E}{k_0} \right) \quad (2)$$

Where  $R$  (J/ (kg. K)) is the gas constant,  $T_p$  (K) is the desorption peak temperature of the TPD curves under different heating rates,  $\beta_H$  (K/min) is the heating rate,  $E$  (kJ/mol) is the active energy between toluene and the sample, and  $k_0$  is the desorption rate coefficient.

## Adsorption kinetics

The intra-particle diffusion model assumes that the effect of the diffusion of VOCs is the rate-controlling step for the sorption process, the intra-particle diffusivity is constant and the direction of the diffusion is radial<sup>1</sup>. This model was used to calculate the intraparticle diffusion rate constant. The model equation is expressed by the following equation:

$$q_t = k_{id}t^{\frac{1}{2}} + C \quad (3)$$

where  $q_t$  is the amount of VOCs sorbed at time  $t$ ,  $k_{id}$  is the intraparticle diffusion rate constant, ' $t$ ' is the time and the value of ' $C$ ' is proportional to the boundary layer.

Pseudo-first-order model, derived from mass balance equation, which can accurately describe external mass transfer process and predict equilibrium adsorption capacity. The expression of this model is generally expressed as follows<sup>2</sup>:

$$q_t = q_e[1 - \exp(-k_1t)] \quad (4)$$

where  $q_t$  and  $q_e$  are the amount of VOCs sorbed at time  $t$  and at equilibrium and  $k_1$  is the rate constant of pseudo-first-order equation.

The pseudo-second-order model assumes that the sorption process is a pseudo-chemical reaction process. This model constitutes a mass action rate model where the surface diffusivity is inversely proportional to the square of concentration of vacant sites on the surface<sup>3</sup>. The equation is expressed by the following equation:

$$q_t = \frac{k_2q_e^2t}{1 + k_2q_et} \quad (5)$$

where  $q_e$  and  $q_t$  are the amount of VOCs adsorbed at equilibrium and at time  $t$ ,  $k_2$  is the pseudo-second order constant and  $t$  is the time.

The Elovich model is based on the Temkin isotherm equation, which is commonly

used to describe the chemical adsorption of gases on solid surfaces. The Elovich equation<sup>4</sup> is expressed as:

$$q_t = \frac{1}{b} \ln(a \times b) + \frac{1}{b} \ln t \quad (6)$$

where  $q_t$  is the amount of VOCs adsorbed at equilibrium and at time  $t$ ,  $a$  is regarded as the initial rate,  $b$  is related to the extent of surface, coverage and activation energy for chemisorption<sup>4</sup>.

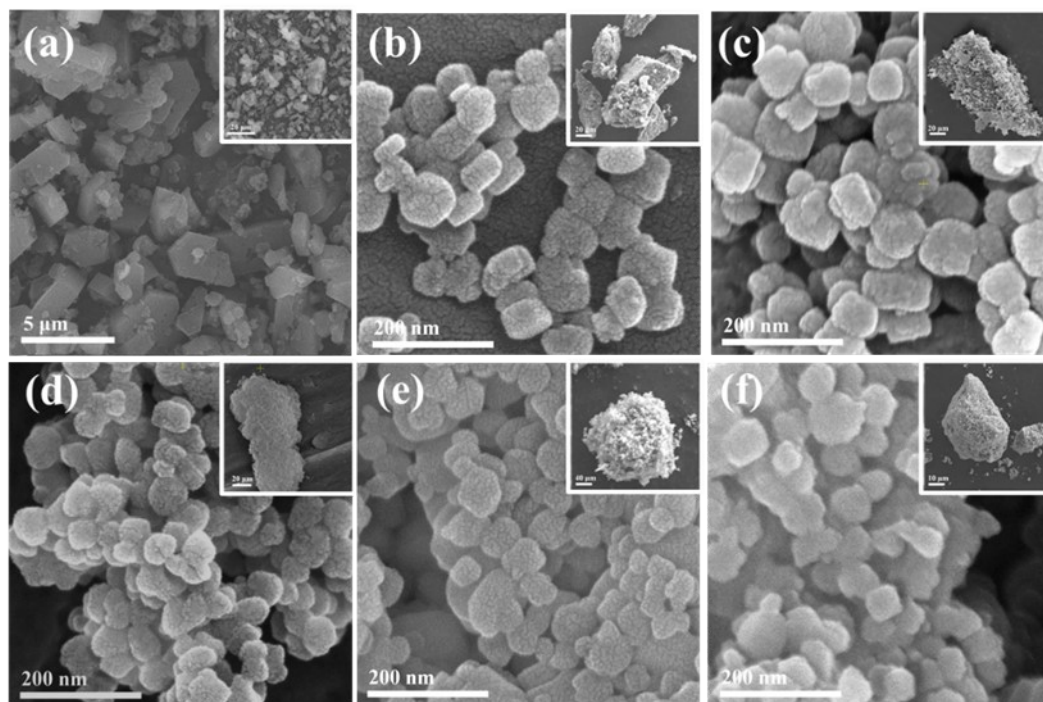

**Fig. S1.** SEM images of MFI zeolites ((a) CM-Al-23, (b) NM-Si, (c) NM-Ti-84, (d) NM-Ti/Al, (e) NM-Al-87, (f) NM-Al-41)

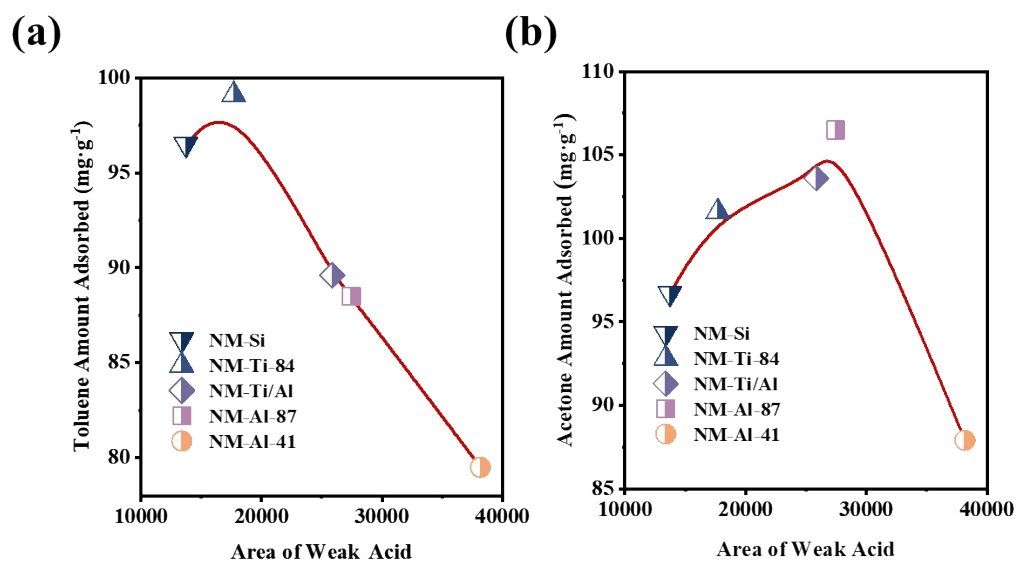

**Fig. S2.** The plot of the relationship between the adsorption of zeolite under dry gas condition and the content of weak acids in MFI zeolites

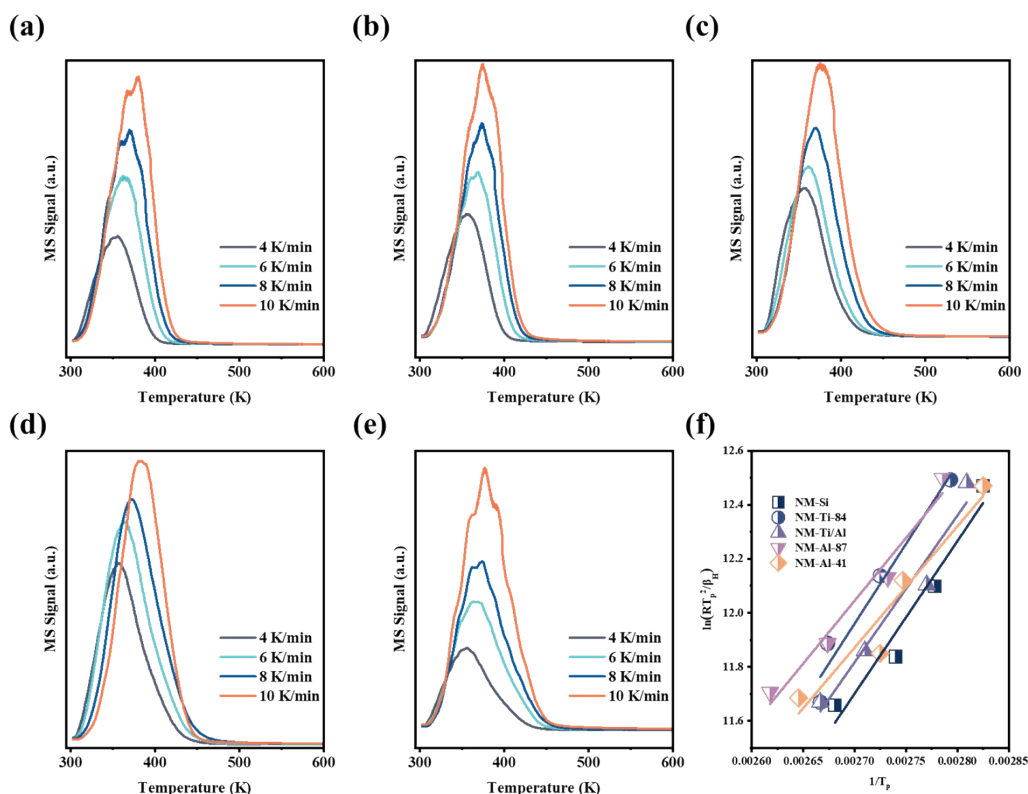

**Fig. S3.** Temperature-programmed toluene desorption measurements under different  $\beta_H$  on NM-Si (a), NM-Ti-84 (b), NM-Ti/Al (c), NM-Al-87 (d), and NM-Al-41 (e) and the linear fitting between  $\ln(RT_p^2/\beta_H)$  and  $1/T_p$  (f).

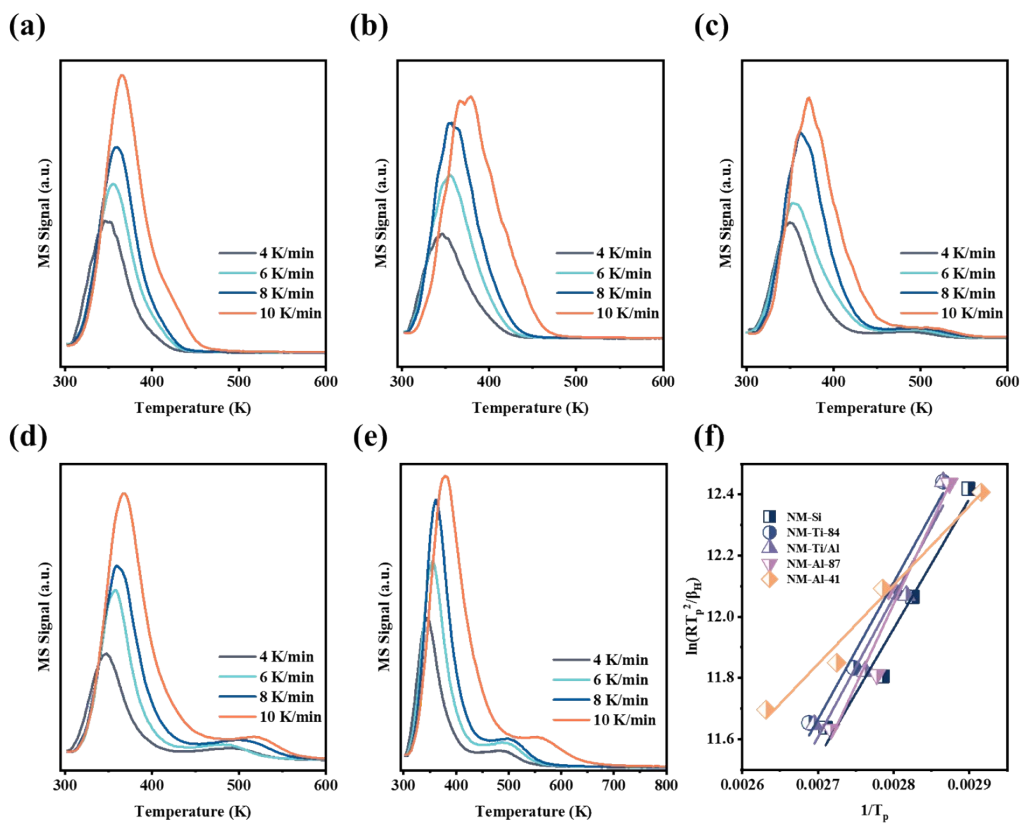

**Fig. S4.** Temperature-programmed acetone desorption measurements under different  $\beta_H$  on NM-Si (a), NM-Ti-84 (b), NM-Ti/Al (c), NM-Al-87 (d), and NM-Al-41 (e) and the linear fitting between  $\ln(RT_p^2/\beta_H)$  and  $1/T_p$  (f).

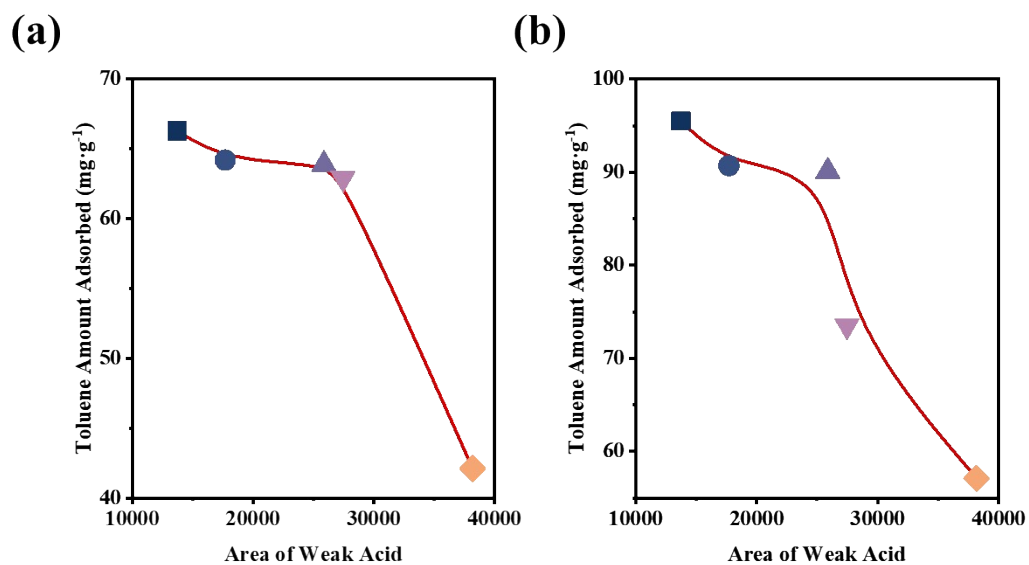

**Fig. S5.** The plot of the relationship between the adsorption of zeolite under wet gas condition and the content of weak acids in MFI zeolites.

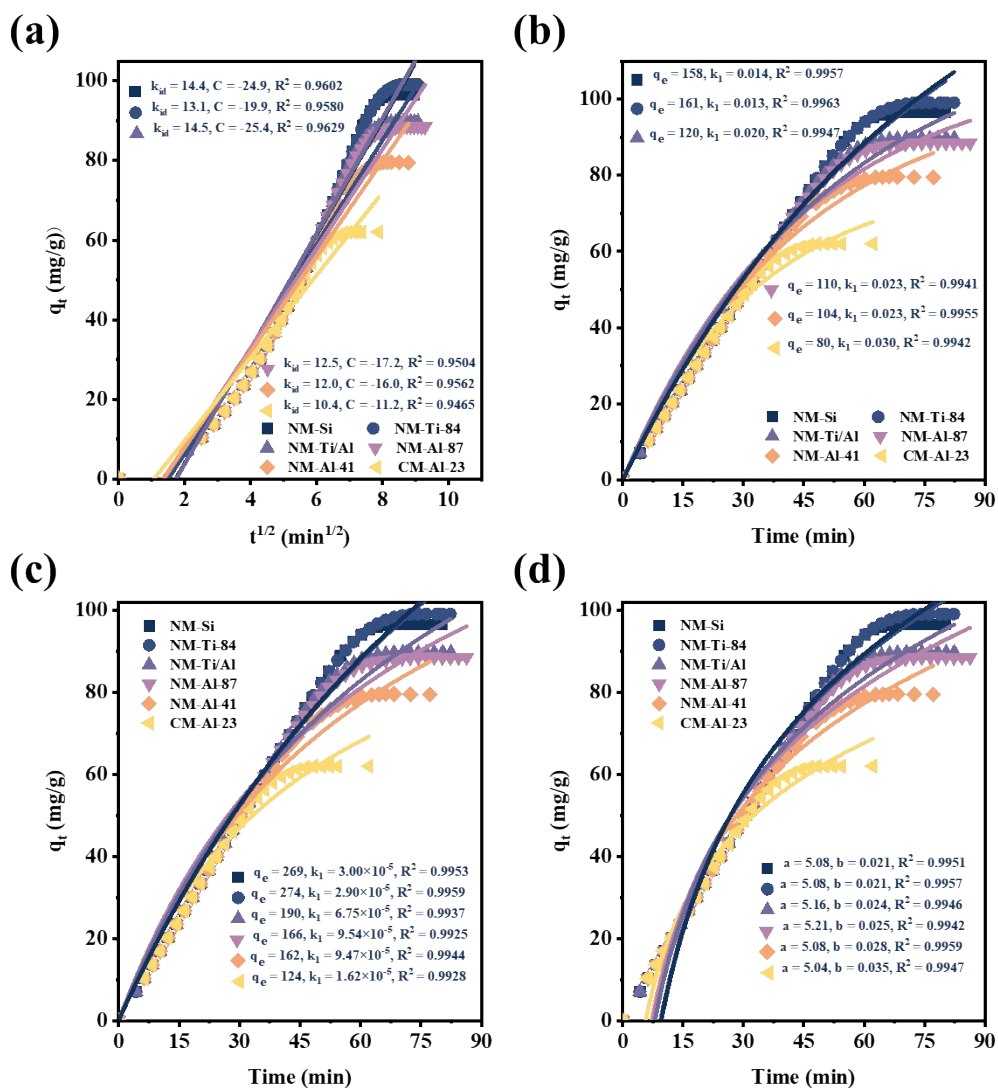

**Fig. S6.** Linear plots of different kinetic models for toluene sorption onto MFI zeolites (a: Intra-particle diffusion model; b: Pseudo-first-order model; c: Pseudo-second-order model; d: Elovich model).

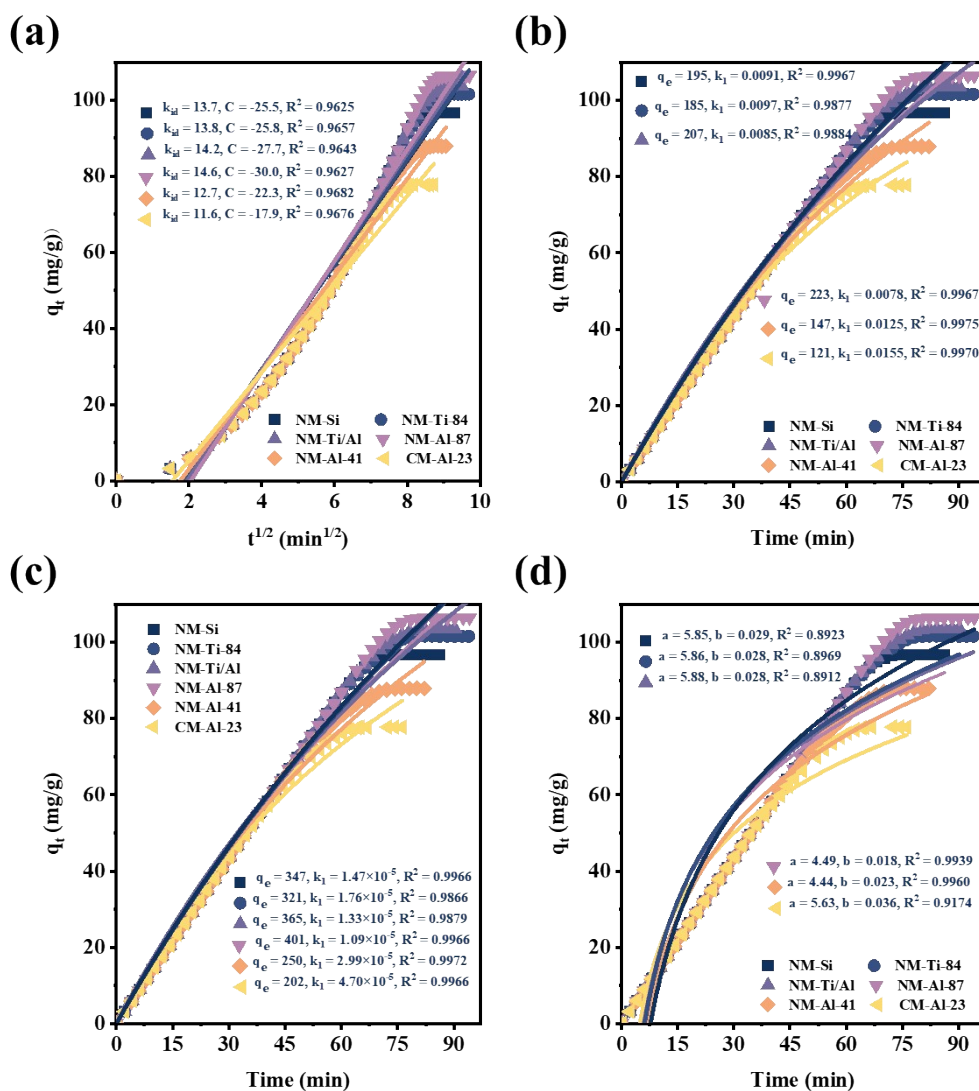

**Fig. S7.** Linear plots of different kinetic models for acetone sorption onto MFI zeolites (a: Intra-particle diffusion model; b: Pseudo-first-order model; c: Pseudo-second-order model; d: Elovich model).

**(a)**

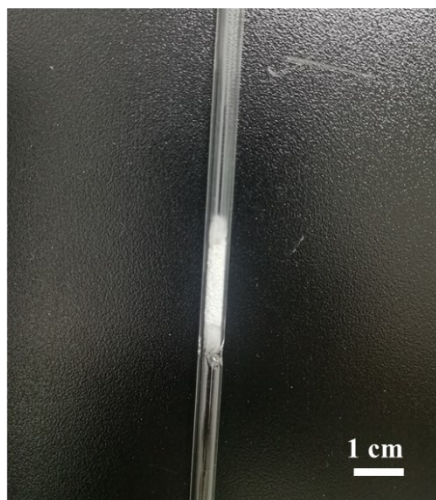

**(b)**

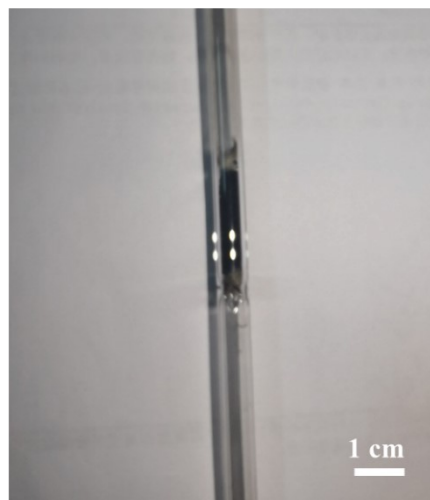

**Fig. S8.** Digital images of NM-Al-41 before (a) and after (b) cyclic acetone sorption.

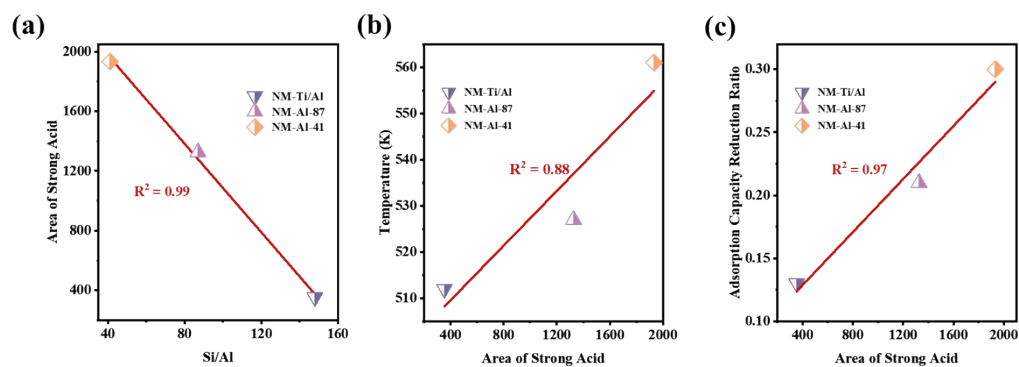

**Fig. S9.** The plots of the strong acid peak areas of NM-Ti/Al, NM-Al-87 and NM-Al-41 as a function of the Si/Al(a), the temperatures corresponding to the second desorption peak of acetone-TPD (b), and the adsorption capacity reduction ratio (c).

**Table S1.** The MFI zeolites synthesis conditions

| Sample   | TEOS<br>(g) | TPAOH<br>(g) | H <sub>2</sub> O<br>(mL) | Seed<br>(g) | Urea<br>(g) | AIP<br>(g) | TBOT<br>(g) | Crystallization<br>temperature and<br>time (K and day) |
|----------|-------------|--------------|--------------------------|-------------|-------------|------------|-------------|--------------------------------------------------------|
| NM-Si    | 2.8         | 4.5          | 4.6                      | 6.2         | 0.5         | /          | /           | 453 (1 day)                                            |
| NM-Ti-84 | 2.8         | 4.5          | 4.6                      | 6.2         | 0.5         | /          | 0.109       | 453 (1 day)                                            |
| NM-Ti/Al | 2.8         | 4.5          | 4.6                      | 6.2         | 0.5         | 0.033      | 0.054       | 453 (1 day)                                            |
| NM-Al-87 | 2.8         | 4.5          | 4.6                      | 6.2         | 0.5         | 0.065      | /           | 453 (1 day)                                            |
| NM-Al-41 | 2.8         | 4.5          | 4.6                      | 6.2         | 0.5         | 0.130      | /           | 453 (1 day)                                            |

**Table S2.** The breakthrough time and adsorption capacity of MFI zeolites

| Samples  | Toluene      |                       | Toluene      |                       |
|----------|--------------|-----------------------|--------------|-----------------------|
|          | Breakthrough | Adsorption            | Breakthrough | Adsorption            |
|          | time         | capacity              | time         | capacity              |
|          | (min)        | (mg·g <sup>-1</sup> ) | (min)        | (mg·g <sup>-1</sup> ) |
| NM-Si    | 46           | 96.5                  | 58           | 96.7                  |
| NM-Ti-84 | 46           | 99.1                  | 58           | 101.6                 |
| NM-Ti/Al | 40           | 89.6                  | 60           | 103.6                 |
| NM-Al-87 | 36           | 88.5                  | 66           | 106.5                 |
| NM-Al-41 | 30           | 79.5                  | 42           | 87.9                  |
| CM-Al-23 | 22           | 62.0                  | 34           | 77.8                  |

**Table S3.** Desorption interaction energy,  $E_d$  and peak temperature  $T_p$  of toluene on MFI zeolites

| Samples  | Value of T <sub>p</sub> (K) for peaks of TPD curve obtained at |              |              |               | E <sub>d</sub><br>(kJ/mol) | R <sup>2</sup> |
|----------|----------------------------------------------------------------|--------------|--------------|---------------|----------------------------|----------------|
|          | heating rate, β <sub>H</sub>                                   |              |              |               |                            |                |
|          | 4<br>(K/min)                                                   | 6<br>(K/min) | 8<br>(K/min) | 10<br>(K/min) |                            |                |
| NM-Si    | 354                                                            | 360          | 365          | 373           | 47.0                       | 0.95           |
| NM-Ti-84 | 358                                                            | 367          | 374          | 375           | 49.1                       | 0.96           |
| NM-Ti/Al | 356                                                            | 361          | 369          | 375           | 45.2                       | 0.96           |
| NM-Al-87 | 359                                                            | 366          | 374          | 382           | 38.7                       | 0.97           |
| NM-Al-41 | 354                                                            | 364          | 367          | 378           | 37.3                       | 0.93           |

**Table S4.** Desorption interaction energy,  $E_d$  and peak temperature  $T_p$  of acetone on MFI zeolites

| Samples  | Value of T <sub>p</sub> (K) for peaks of TPD curve obtained at |              |              |               | E <sub>d</sub><br>(kJ/mol) | R <sup>2</sup> |
|----------|----------------------------------------------------------------|--------------|--------------|---------------|----------------------------|----------------|
|          | heating rate, β <sub>H</sub>                                   |              |              |               |                            |                |
|          | 4<br>(K/min)                                                   | 6<br>(K/min) | 8<br>(K/min) | 10<br>(K/min) |                            |                |
| NM-Si    | 356                                                            | 364          | 371          | 380           | 35.3                       | 0.97           |
| NM-Ti-84 | 356                                                            | 368          | 374          | 375           | 37.2                       | 0.99           |
| NM-Ti/Al | 356                                                            | 362          | 370          | 377           | 38.1                       | 0.94           |
| NM-Al-87 | 357                                                            | 364          | 396          | 402           | 44.1                       | 0.95           |
| NM-Al-41 | 354                                                            | 364          | 373          | 377           | 25.9                       | 0.98           |

**Table S5.** Kinetic data and correlation coefficient  $R^2$  obtained from intraparticle diffusion model

| Sample   | Toluene                                        |                         |        | Acetone                                        |                         |        |
|----------|------------------------------------------------|-------------------------|--------|------------------------------------------------|-------------------------|--------|
|          | $k_{id}$                                       | C                       | $R^2$  | $k_{id}$                                       | C                       | $R^2$  |
|          | ( $\text{mg/g}_{ads} \cdot \text{min}^{1/2}$ ) | ( $\text{mg/g}_{ads}$ ) |        | ( $\text{mg/g}_{ads} \cdot \text{min}^{1/2}$ ) | ( $\text{mg/g}_{ads}$ ) |        |
| NM-Si    | 14.4                                           | -24.9                   | 0.9602 | 13.7                                           | -25.5                   | 0.9625 |
| NM-Ti-84 | 13.1                                           | -19.9                   | 0.9580 | 13.8                                           | -25.8                   | 0.9657 |
| NM-Ti/Al | 14.5                                           | -25.4                   | 0.9629 | 14.2                                           | -27.7                   | 0.9643 |
| NM-Al-87 | 12.5                                           | -17.2                   | 0.9504 | 14.6                                           | -30.0                   | 0.9627 |
| NM-Al-41 | 12.0                                           | -16.0                   | 0.9562 | 12.7                                           | -22.3                   | 0.9682 |
| CM-Al-23 | 10.4                                           | -11.2                   | 0.9465 | 11.6                                           | -17.9                   | 0.9676 |

**Table S6.** Kinetic data and correlation coefficient  $R^2$  obtained from pseudo-first order kinetic model

| Sample   | Toluene                |                      |        | Acetone                |                      |        |
|----------|------------------------|----------------------|--------|------------------------|----------------------|--------|
|          | $q_e$                  | $k_1$                | $R^2$  | $q_e$                  | $k_1$                | $R^2$  |
|          | (mg/g <sub>ads</sub> ) | (min <sup>-1</sup> ) |        | (mg/g <sub>ads</sub> ) | (min <sup>-1</sup> ) |        |
| NM-Si    | 158                    | 0.014                | 0.9957 | 195                    | 0.0091               | 0.9967 |
| NM-Ti-84 | 161                    | 0.013                | 0.9963 | 185                    | 0.0097               | 0.9877 |
| NM-Ti/Al | 120                    | 0.020                | 0.9947 | 207                    | 0.0085               | 0.9884 |
| NM-Al-87 | 110                    | 0.023                | 0.9941 | 223                    | 0.0078               | 0.9967 |
| NM-Al-41 | 104                    | 0.023                | 0.9955 | 147                    | 0.0125               | 0.9975 |
| CM-Al-23 | 80                     | 0.030                | 0.9942 | 121                    | 0.0155               | 0.9970 |

**Table S7.** Kinetic data and correlation coefficient  $R^2$  obtained from pseudo-second order kinetic model

| Sample   | Toluene                |                       |        | Acetone                |                       |        |
|----------|------------------------|-----------------------|--------|------------------------|-----------------------|--------|
|          | $q_e$                  | $k_2$                 | $R^2$  | $q_e$                  | $k_2$                 | $R^2$  |
|          | (mg/g <sub>ads</sub> ) | (min <sup>-1</sup> )  |        | (mg/g <sub>ads</sub> ) | (min <sup>-1</sup> )  |        |
| NM-Si    | 269                    | $3.00 \times 10^{-5}$ | 0.9953 | 347                    | $1.47 \times 10^{-5}$ | 0.9966 |
| NM-Ti-84 | 274                    | $2.90 \times 10^{-5}$ | 0.9959 | 321                    | $1.76 \times 10^{-5}$ | 0.9866 |
| NM-Ti/Al | 190                    | $6.75 \times 10^{-5}$ | 0.9937 | 365                    | $1.33 \times 10^{-5}$ | 0.9879 |
| NM-Al-87 | 166                    | $9.54 \times 10^{-5}$ | 0.9925 | 401                    | $1.09 \times 10^{-5}$ | 0.9966 |
| NM-Al-41 | 162                    | $9.47 \times 10^{-5}$ | 0.9944 | 250                    | $2.99 \times 10^{-5}$ | 0.9972 |
| CM-Al-23 | 124                    | $1.62 \times 10^{-4}$ | 0.9928 | 202                    | $4.70 \times 10^{-5}$ | 0.9966 |

**Table S8.** Kinetic data and correlation coefficient  $R^2$  obtained from Elovich model

| Sample   | Toluene                                   |                        |        | Acetone                                   |                        |        |
|----------|-------------------------------------------|------------------------|--------|-------------------------------------------|------------------------|--------|
|          | a                                         | b                      | $R^2$  | a                                         | b                      | $R^2$  |
|          | (mg/g <sub>ads</sub> ·min <sup>-1</sup> ) | (g <sub>ads</sub> /mg) |        | (mg/g <sub>ads</sub> ·min <sup>-1</sup> ) | (g <sub>ads</sub> /mg) |        |
| NM-Si    | 5.08                                      | 0.021                  | 0.9951 | 5.85                                      | 0.029                  | 0.8923 |
| NM-Ti-84 | 5.08                                      | 0.021                  | 0.9957 | 5.86                                      | 0.028                  | 0.8969 |
| NM-Ti/Al | 5.16                                      | 0.024                  | 0.9946 | 5.88                                      | 0.028                  | 0.8912 |
| NM-Al-87 | 5.21                                      | 0.025                  | 0.9942 | 4.49                                      | 0.018                  | 0.9939 |
| NM-Al-41 | 5.08                                      | 0.028                  | 0.9959 | 4.44                                      | 0.023                  | 0.9960 |
| CM-Al-23 | 5.04                                      | 0.035                  | 0.9947 | 5.63                                      | 0.036                  | 0.9174 |

## References

- [1] L. Cáceres, M. Escudey, E. Fuentes, M.E. Báez, *Journal of Hazardous Materials*, 2010, 179, 795-803.
- [2] A.K. Nayak, A. Pal, *Journal of Molecular Liquids*, 2019, 276, 67-77.
- [3] Y.S. Ho, G. McKay, *Process Biochemistry*, 1999, 34, 451-465.
- [4] G. Skodras, I. Diamantopoulou, G. Pantoleontos, G.P. Sakellarpoulos, *Journal of Hazardous Materials*, 2008, 158, 1-13.
